# Supplementary material for: Rapid clearance of bacteria from maternal bloodstream after delivery in pregnancies complicated by preterm pre-labor rupture of the membranes
Source: Research Square preprint supplement (doi:10.21203/rs.3.rs-7359456/v1), 2025-09-11
Supplement: Supplementary file 1 [file 79b55eea2078a51c47d4ccaa.docx]

**Table 1. Demographic and clinical characteristics of mothers and their newborns**

| **Variable** | **Median [IQR] or n (%)** |
| --- | --- |
| **Maternal characteristics** | **n = 66** |
| Age, *years* | 28 [23 – 32] |
| Race/ethnicity  Non-Hispanic White  Non-Hispanic Black  Hispanic  Asian | 53 (80)  9 (14)  3 (5)  1 (1) |
| Parity  Nulliparous  Para 1  Para ≥2 | 29 (44)  20 (30)  17 (26) |
| Multiple (twin) gestation | 5 (8) |
| Body Mass Index, *kg/m2* | 30 [27 – 37] |
| History of preterm birth | 3 (5) |
| Gestational age at PPROM, *weeks* | 33 [28 – 34] |
| Gestational age at PPROM, *intervals*  <250/7 weeks  250/7-276/7 weeks  280/7-316/7weeks  320/7-336/7 weeks  340/7-366/7weeks | 10 (15)  7 (11)  14 (21)  14 (21)  21 (32) |
| Clinical chorioamnionitis | 10 (15) |
| Progesterone treatment during pregnancy | 12 (18) |
| Tocolytic treatment | 6 (9) |
| Antenatal magnesium sulfate | 23 (35) |
| Antenatal steroid exposure | 59 (89) |
| Antenatal antibiotic treatment | 65 (98) |
| Latency by gestational age periods, *days*  <250/7 weeks  250/7-276/7 weeks  280/7-316/7weeks  320/7-336/7 weeks  340/7-366/7weeks | 13 [3 – 25]  9 [1 – 17]  6 [3 – 13]  5 [1 – 6]  0 [0 – 1] |
| Gestational age at delivery, *weeks* | 33 [30 – 34] |
| Gestational age at delivery, *intervals*  <250/7 weeks  250/7-276/7 weeks  280/7-316/7weeks  320/7-336/7 weeks  340/7-366/7weeks | 3 (5)  10 (15)  9 (13)  15 (23)  29 (44) |
| Cesarean delivery | 23 (35) |
| **Newborn characteristics** | **n = 71** |
| Birthweight, *grams* | 1,945 [1,316 – 2,382] |
| Newborn sex  Female  Male | 29 (41)  42 (59) |
| Apgar score at 1 minute <7 | 25 (38) |
| Apgar score at 5 minutes <7 | 11 (17) |

Abbreviations: PPROM, preterm premature rupture of membranes
