# Supplementary material for: Rapid clearance of bacteria from maternal bloodstream after delivery in pregnancies complicated by preterm pre-labor rupture of the membranes
Source: Research Square preprint supplement (doi:10.21203/rs.3.rs-7359456/v1), 2025-09-11
Supplement: Supplementary file 2 [file 7bb4bb3d90bb1956ab0ac6cd.docx]

**Table 2. Clinical and Laboratory Characteristics of Pregnancies (n=66) and Newborns (n=71) by Status of Antenatal Exposure to Triple I**

| **Maternal and pregnancy-related variables** | **NEXP = 35** | **EXP = 31** | ***p* value** |
| --- | --- | --- | --- |
| ***Clinical and Laboratory Characteristics*** | | | |
| Plurality †  Singleton pregnancy  Twin pregnancy* | 32 (48)  3 (5) | 29 (44)  2 (3) | 0.667 |
| GA at PPROM, *weeks* ‡ | 34 [33 – 34] | 28 [24 – 32] | <0.001 |
| GA at delivery, *weeks* ‡ | 34 [33- 35] | 30 [27 – 33] | <0.001 |
| Latency, *days* ‡ | 0 [0 – 4] | 5 [2 -12] | <0.001 |
| Cesarean delivery † | 12 (34) | 11 (35) |  |
| Admission WBC count, *cells x 1,000/mm3* ‡ | 12.4 [8.8 – 14.3] | 13.1 [10.9 – 17.3] | 0.072 |
| Pre-delivery WBC count, *cells x 1,000/mm3* ‡ | 12.1 [9.3 – 14.6] | 15.7 [12.8 – 19.3] | <0.001 |
| Post-partum WBC count, *cells x 1,000/mm3* ‡ | 14.7 [11.1 – 18.7] | 15.5 [13.6 – 21.6] | 0.128 |
| Abdominal pain † | 5 (15) | 13 (42) | 0.025 |
| Chills † | 1 (3) | 1 (3) | 1.000 |
| Diagnosis of clinical chorioamnionitis † | 3 (9) | 6 (19) | 0.290 |
| **Placenta-related variables** ¶ | **NEXP = 35** | **EXP = 28** | ***p* value** |
| ***Placental Pathology Results*** | | | |
| Fetal membrane inflammation (histologic chorioamnionitis) † | 1 (3) | 26 (93) | <0.001 |
| Umbilical cord inflammation (funisits) † | 1 (3) | 15 (54) | <0.001 |
| Placental disc inflammation (villitis) † | 1 (3) | 5 (18) | 0.080 |
| Placenta hemorrhage/abruption † | 1 (3) | 3 (11) | 0.315 |
| **Newborn-related variables** | **NEXP = 40** | **EXP = 31** | ***p* value** |
| ***Clinical and Laboratory Characteristics*** | | | |
| Birthweight, *grams* ‡ | 2,125 [1,760 – 2,572] | 1,375 [961 – 1,987] | <0.001 |
| Newborn female sex † | 16 (40) | 13 (42) | 1.000 |
| 1-min Apgar <7 | 8 (20) | 17 (55) | 0.003 |
| 5-min Apgar <7 | 4 (10) | 7 (23) | 0.192 |
| WBC count, *cells x 1,000/mm3* ‡ | 11.1 [8.5 – 15.1] | 14.2 [8.7 – 21.9] | 0.204 |
| Hemoglobin, *g/dL* ‡ | 16.2 [15.1 – 18.5] | 15.7 [14.2 – 16.9] | 0.116 |
| Hematocrit, *%* ‡ | 48.9 [44.7 – 54.8] | 47.7 [43.3 – 51.6] | 0.233 |
| Bands, *%* ‡ | 1 [0 – 2] | 2 [1 – 4] | 0.036 |
| Segmented neutrophils, % ‡ | 43 [32 – 54] | 38 [21 -52] | 0.109 |
| Monocytes, *%* ‡ | 9 [5 – 12] | 9 [6 – 13] | 0.215 |
| Lymphocytes, *%* ‡ | 43 [30 – 54] | 42 [30 – 58] | 0.577 |
| Nucleated RBCs, *cells/mm3* ‡ | 3 [2 – 8] | 13 [4 – 20] | <0.001 |
| ***Research Laboratory Cord Blood Markers*** | | | |
| Cord blood interleukin-6, *pg/mL* ‡ | 1.3 [0.4 – 2.5] | 83.3 [19.7 – 283.6] | <0.001 |
| Cord blood interleukin-6 >100 pg/mL † | 0 (0) | 12 (39) | <0.001 |
| Cord blood haptoglobin, *ng/mL* ‡ | 732 [355 – 1,478] | 19,553 [10,196 – 37,307] | <0.001 |
| Haptoglobin switch-on pattern † | 0 (0) | 28 (90) | <0.001 |

* Five di-chorionic-diamniotic pregnancies were included in the study. Multiple pregnancies were considered EXP if at least one newborn qualifies as EXP based on research cord blood biomarkers.

† Variable presented as n (%) and proportions compared by Fisher’s exact test

‡ Variable presented as median [interquartile range] and compared by the Mann-Whitney test

¶ Placental pathology results were missing in 3 EXP and 5 NEXP newborns.

Abbreviations: NEXP, non-exposed antenatally to Triple I; EXP, exposed to Triple I; PPROM, preterm premature rupture of membranes; WBC, white blood cell; RBC, red blood cell
